# Supplementary figures and images for: CpG and UpA dinucleotides in both coding and non-coding regions of echovirus 7 inhibit replication initiation post-entry
Source: eLife journal article supplement (doi:10.7554/elife.29112), 2017-09-29

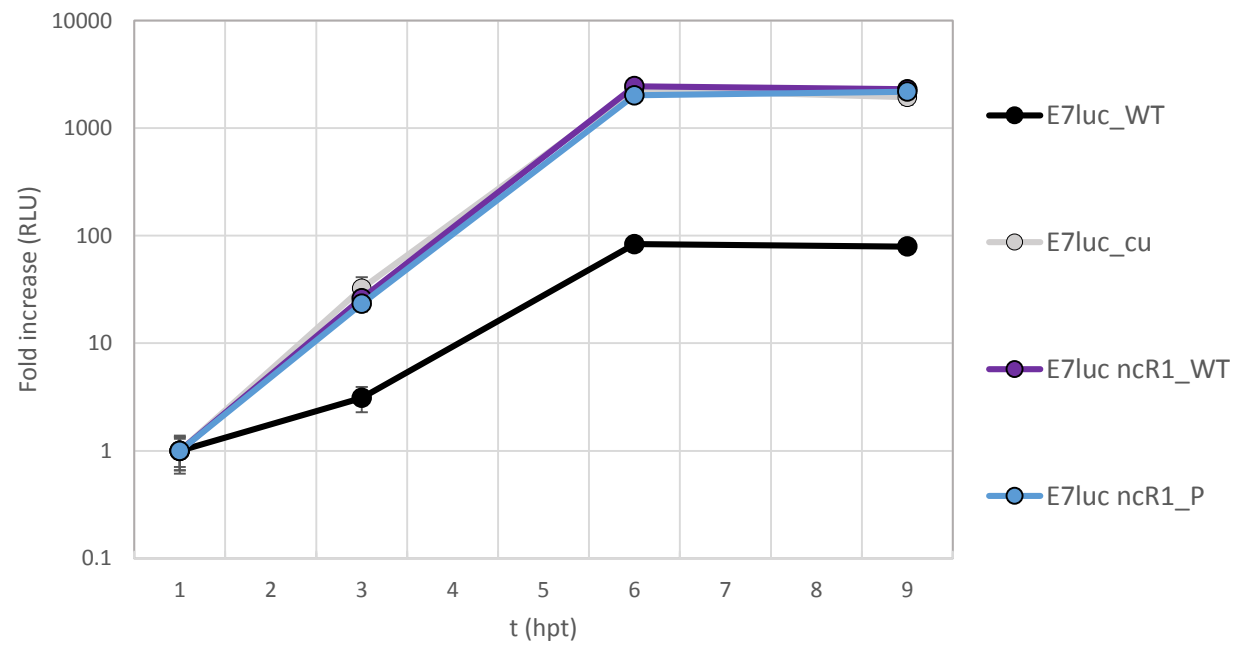

Supplement: supp [file elife-29112-supp-v1.zip]

**A****Replicon**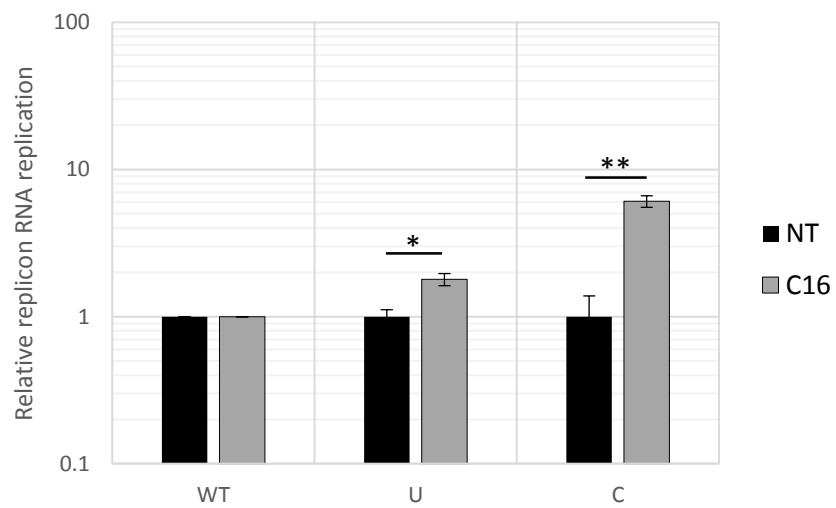**B****Virus**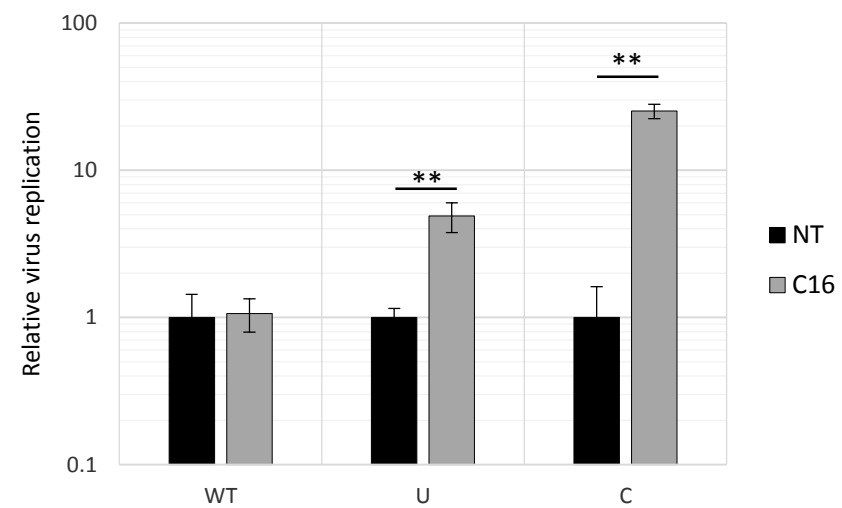

Supplement: supp [file elife-29112-supp-v1.zip]

Side-Scattered light

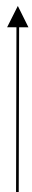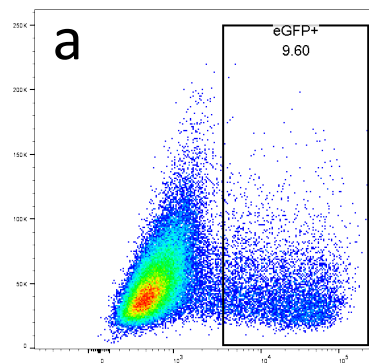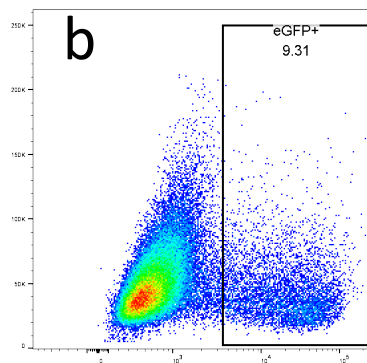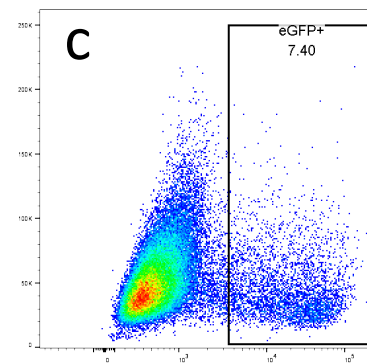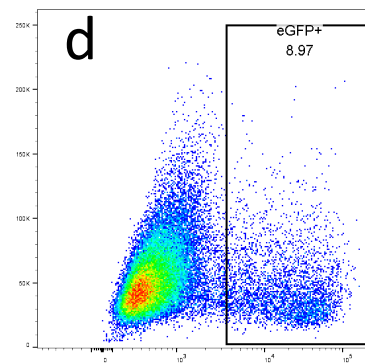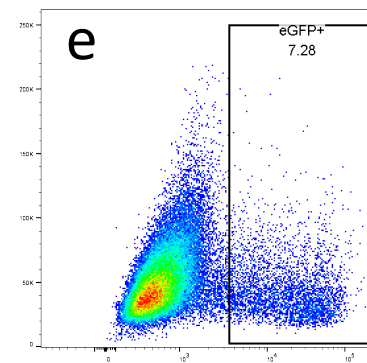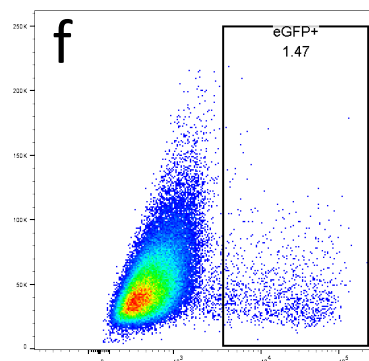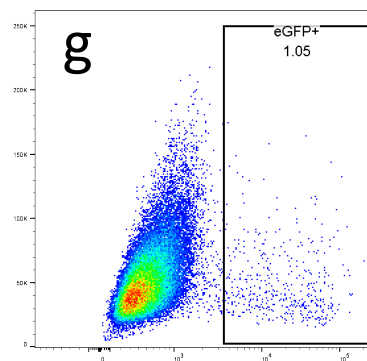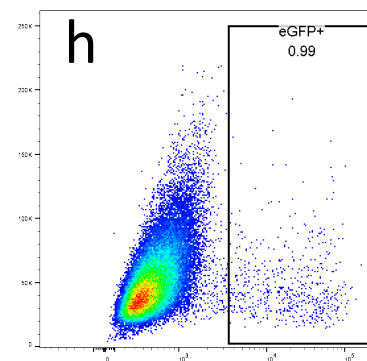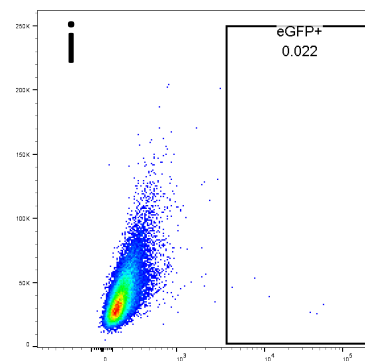

EGFP expression

Supplement: supp [file elife-29112-supp-v1.zip]

**A****Virus infectivity**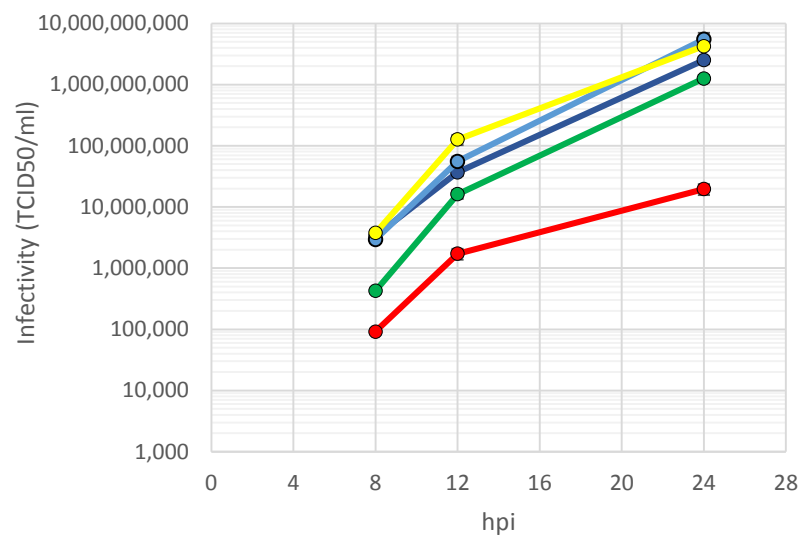**B****RNA copies**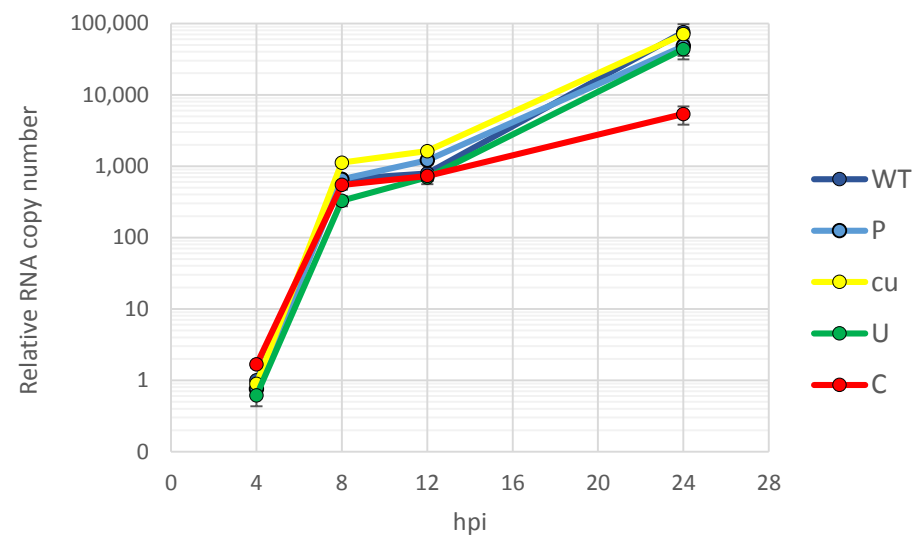

Supplement: supp [file elife-29112-supp-v1.zip]

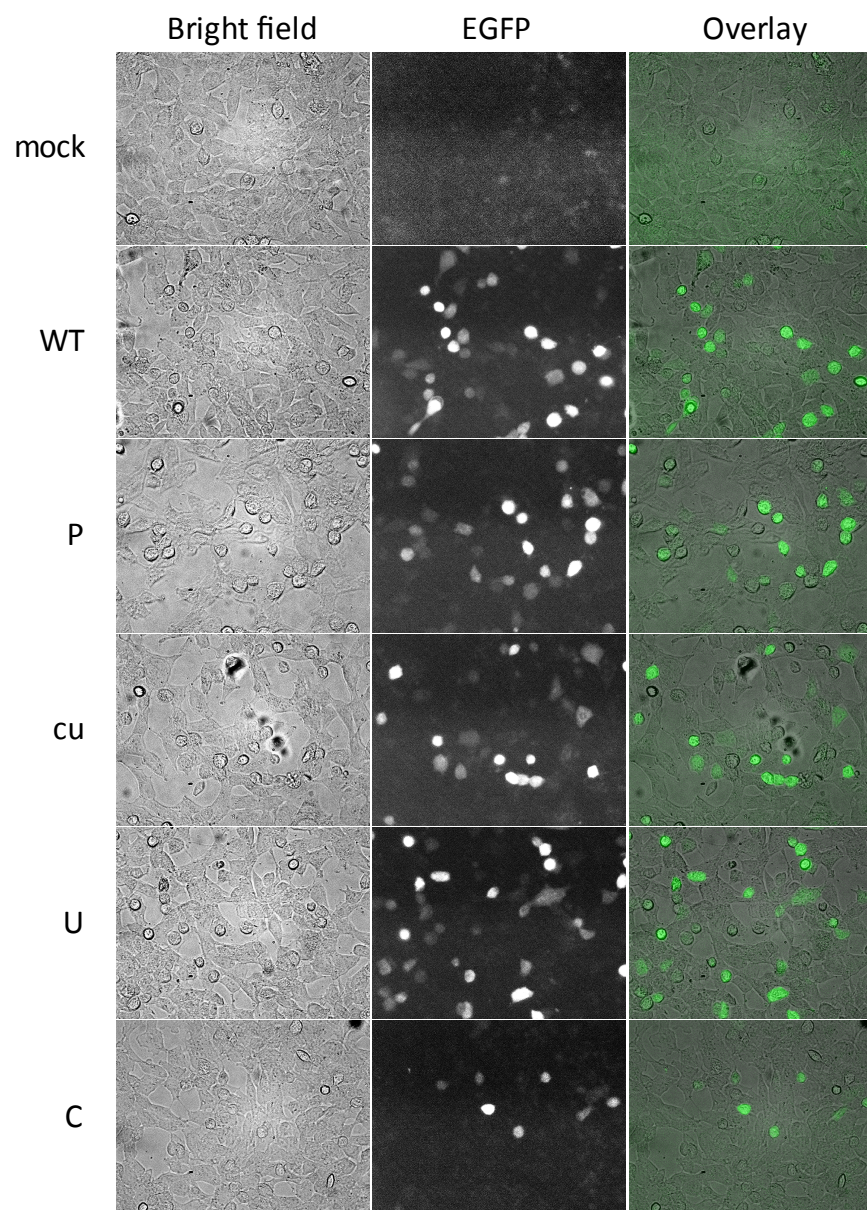

Supplement: supp [file elife-29112-supp-v1.zip]

**A**

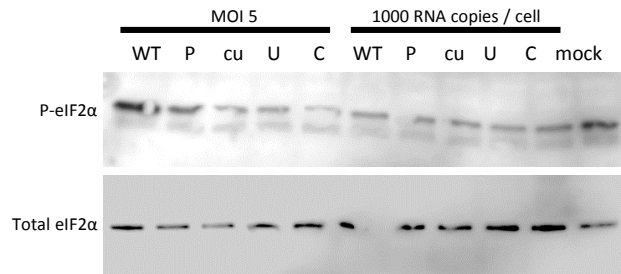

**B**

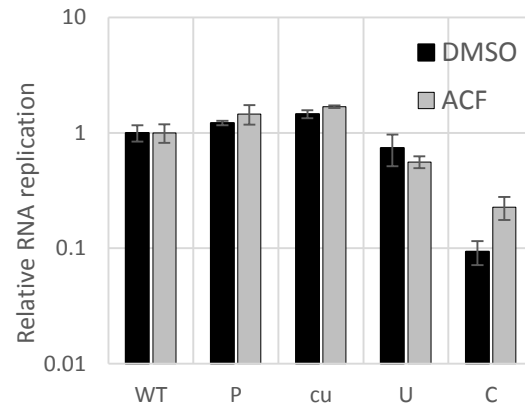

**C**

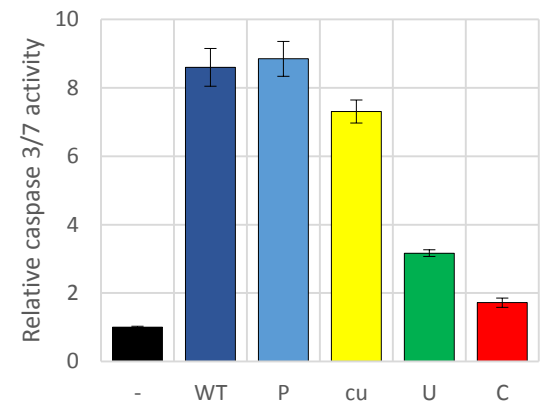

Supplement: supp [file elife-29112-supp-v1.zip]

Side-Scattered light

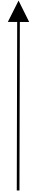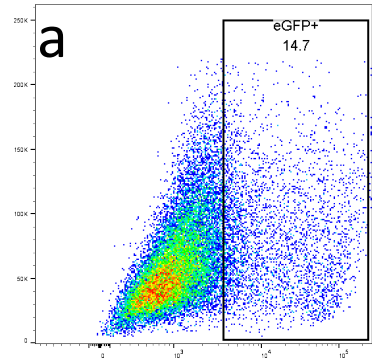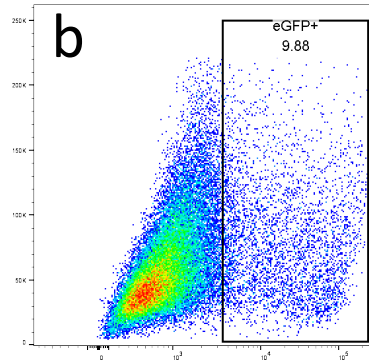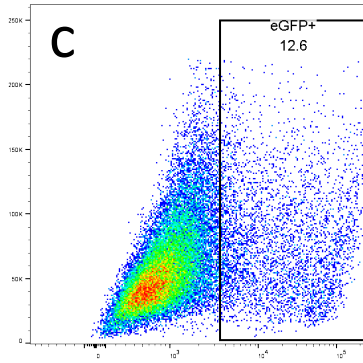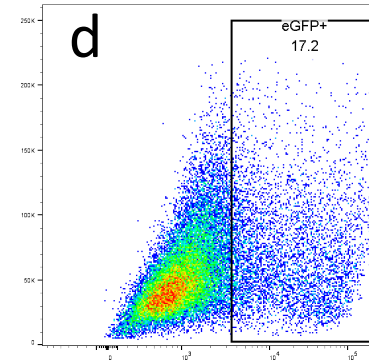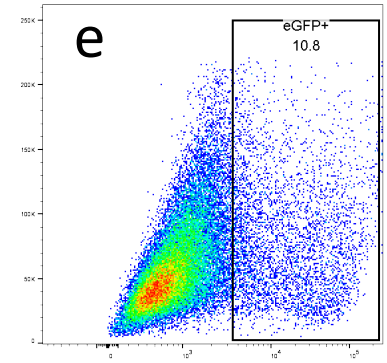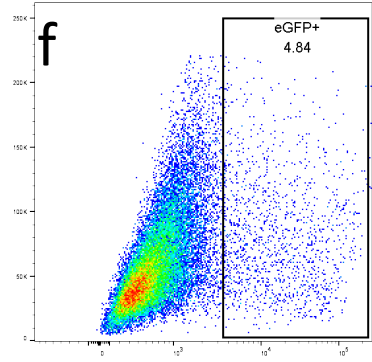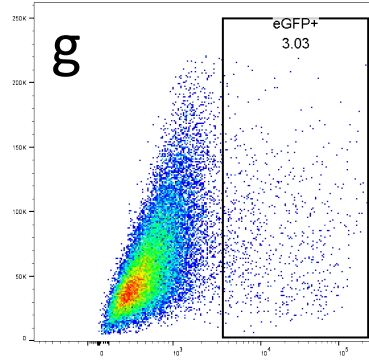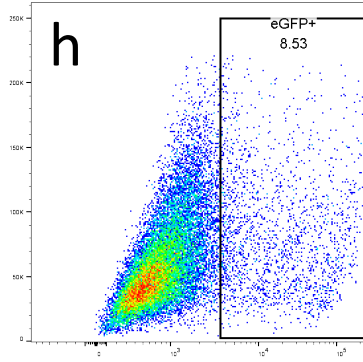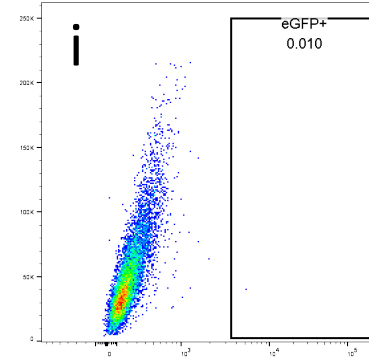

EGFP expression

Supplement: supp [file elife-29112-supp-v1.zip]

A

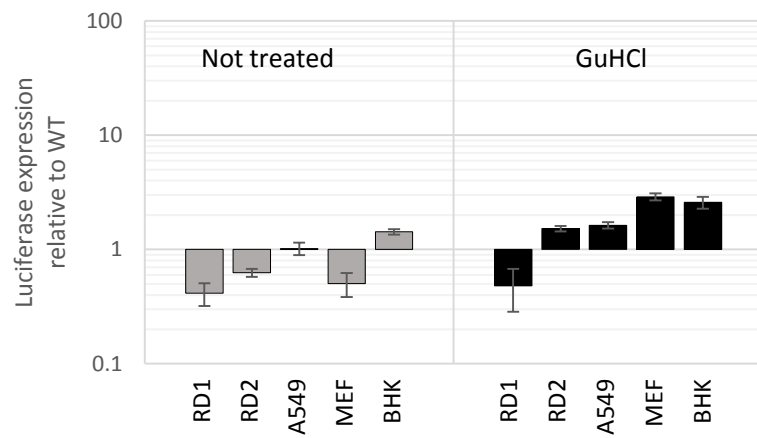

B

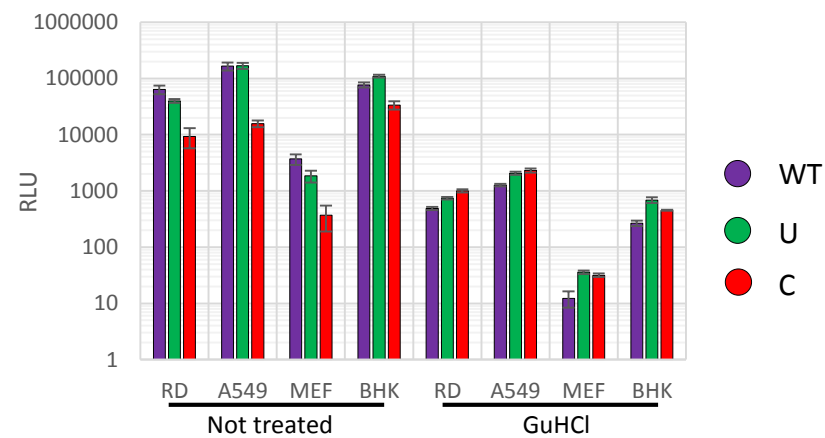

Supplement: supp [file elife-29112-supp-v1.zip]

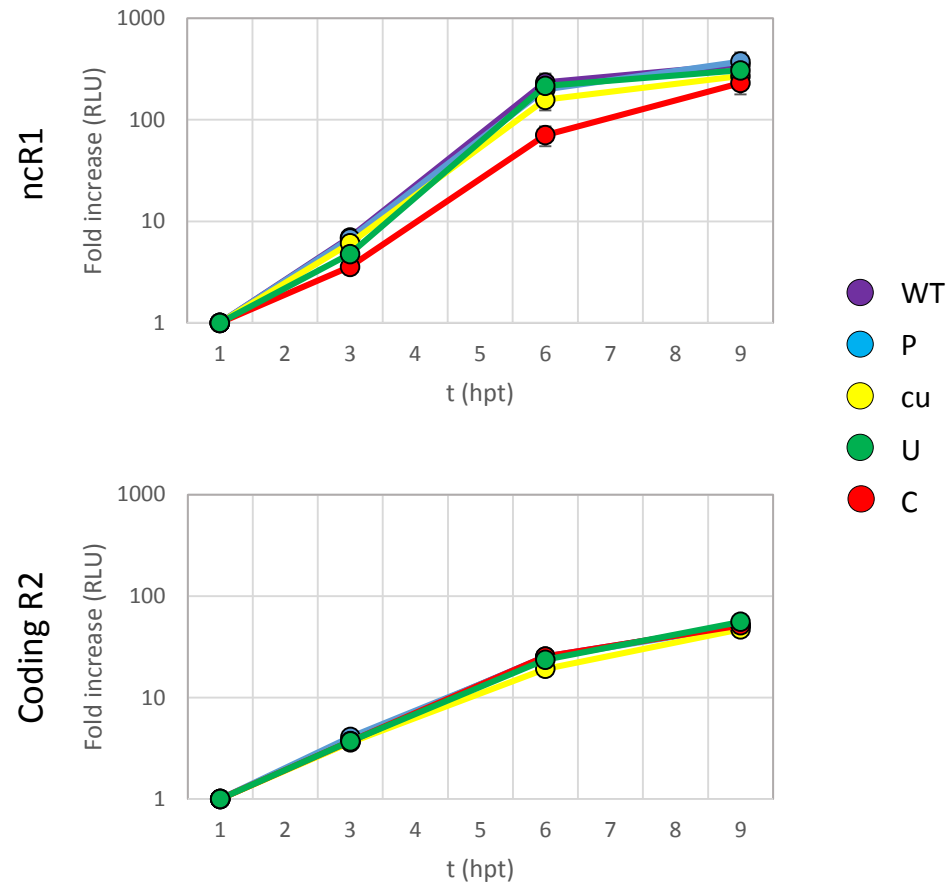

Supplement: supp [file elife-29112-supp-v1.zip]
